# Supplementary material for: Adipose-derived mesenchymal stem cells attenuate ischemic brain injuries in rats by modulating miR-21-3p/MAT2B signaling transduction
Source: PubMed Central journal article supplement (PMC6852138; doi:10.3325/cmj.2019.60.439), 2019-10
Supplement: CroatMedJ_60_s001.pdf [file CroatMedJ_60_s001.pdf]

**Table S1 Detailed information of antibodies**

| Antibody                         | Product    | Host species     | Supplier    | Country | Dilution |
|----------------------------------|------------|------------------|-------------|---------|----------|
| ZO-1                             | 21773-1-AP | Rabbit           | Proteintech | CN      | 1:50     |
| Claudin-5                        | sc-28670   | Rabbit           | Santa Cruz  | CN      | 1:50     |
| OX-2                             | ab1211     | Mouse            | Abcam       | UK      | 1:200    |
| Cy3-labeled goat anti-rabbit IgG | A0516      | Goat             | Beyotime    | CN      | 1:200    |
| Cy3-labeled goat anti-mouse IgG  | A0521      | Goat             | Beyotime    | CN      | 1:200    |
| MAT2B                            | ab109484   | Rabbit           | Abcam       | UK      | 1:1000   |
| Cleaved caspase-3                | #9661      | Mouse            | CST         | CN      | 1:1000   |
| Bcl-2                            | bs-0032R   | Rabbit           | BIOSS       | CN      | 1:500    |
| Bax                              | bs-0127R   | Rabbit           | BIOSS       | CN      | 1:500    |
| Goat anti-rabbit IgG-HRP         | A0208      | Goat             | Beyotime    | CN      | 1:5000   |
| Goat anti-mouse IgG-HRP          | A0216      | Goat             | Beyotime    | CN      | 1:5000   |
| $\beta$ -actin                   | sc-47778   | Mouse            | Santa Cruz  | USA     | 1:1000   |
| CD29                             | 11-0291-80 | Armenian hamster | Ebioscience | USA     | 1:500    |
| CD44                             | 12-0444-80 | Mouse            | Ebioscience | USA     | 1:1000   |
| CD45                             | 11-0461-80 | Mouse            | Ebioscience | USA     | 1:200    |
| CD90                             | 11-0900-81 | Mouse            | Ebioscience | USA     | 1:500    |
| CD34                             | ab187284   | Mouse            | Abcam       | UK      | 1:500    |
