# Supplementary material for: Adipose-derived mesenchymal stem cells attenuate ischemic brain injuries in rats by modulating miR-21-3p/MAT2B signaling transduction
Source: PubMed Central journal article supplement (PMC6852138; doi:10.3325/cmj.2019.60.439), 2019-10

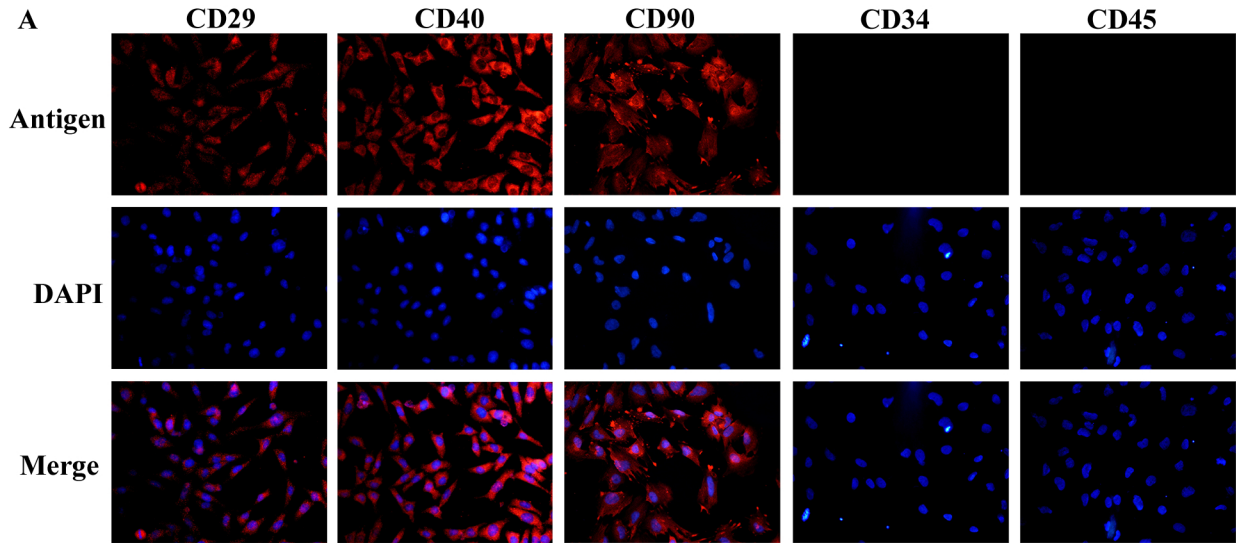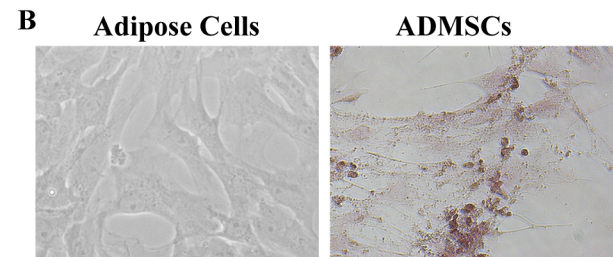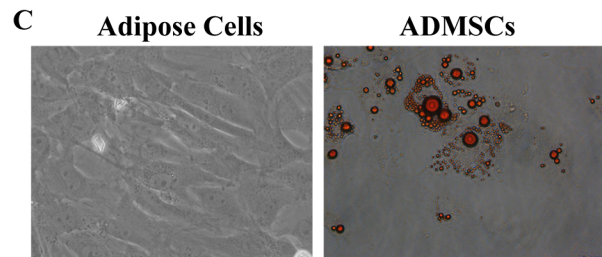

Supplement: CroatMedJ_60_s002.pdf [file CroatMedJ_60_s002.pdf]
