# Supplementary material for: Adipose-derived mesenchymal stem cells attenuate ischemic brain injuries in rats by modulating miR-21-3p/MAT2B signaling transduction
Source: PubMed Central journal article supplement (PMC6852138; doi:10.3325/cmj.2019.60.439), 2019-10

**Bax**

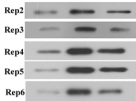

**MAT2B**

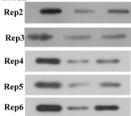

**Bcl-2**

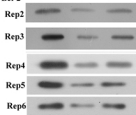

**MAT2B**

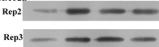

Supplement: CroatMedJ_60_s004.pdf [file CroatMedJ_60_s004.pdf]
